# Supplementary material for: Comparative Analysis of Proteomes of a Number of Nosocomial Pathogens by KEGG Modules and KEGG Pathways
Source: PubMed Central journal article supplement (PMC7660090; doi:10.3390/ijms21217839), 2020-10-22
Supplement: ijms-21-07839-s001.pdf [file ijms-21-07839-s001.pdf]

Supplementary Table S1. *S. aureus* KEGG-modules.

| <b>KEGG-module ID</b> | <b>KEGG-module description</b>                                                                    | <b>Genomes</b> | <b>Frequency</b> |
|-----------------------|---------------------------------------------------------------------------------------------------|----------------|------------------|
| <b>M00001</b>         | Glycolysis (Embden-Meyerhof pathway), glucose => pyruvate                                         | 53             | 1                |
| <b>M00002</b>         | Glycolysis, core module involving three-carbon compounds                                          | 53             | 1                |
| <b>M00007</b>         | Pentose phosphate pathway, non-oxidative phase, fructose 6P => ribose 5P                          | 53             | 1                |
| <b>M00010</b>         | Citrate cycle, first carbon oxidation, oxaloacetate => 2-oxoglutarate                             | 53             | 1                |
| <b>M00018</b>         | Threonine biosynthesis, aspartate => homoserine => threonine                                      | 53             | 1                |
| <b>M00022</b>         | Shikimate pathway, phosphoenolpyruvate + erythrose-4P => chorismate                               | 53             | 1                |
| <b>M00045</b>         | Histidine degradation, histidine => N-formiminoglutamate => glutamate                             | 53             | 1                |
| <b>M00050</b>         | Guanine ribonucleotide biosynthesis IMP => GDP,GTP                                                | 53             | 1                |
| <b>M00052</b>         | Pyrimidine ribonucleotide biosynthesis, UMP => UDP/UTP,CDP/CTP                                    | 53             | 1                |
| <b>M00082</b>         | Fatty acid biosynthesis, initiation                                                               | 53             | 1                |
| <b>M00120</b>         | Coenzyme A biosynthesis, pantothenate => CoA                                                      | 53             | 1                |
| <b>M00123</b>         | Biotin biosynthesis, pimeloyl-ACP/CoA => biotin                                                   | 53             | 1                |
| <b>M00140</b>         | C1-unit interconversion, prokaryotes                                                              | 53             | 1                |
| <b>M00307</b>         | Pyruvate oxidation, pyruvate => acetyl-CoA                                                        | 53             | 1                |
| <b>M00345</b>         | Formaldehyde assimilation, ribulose monophosphate pathway                                         | 53             | 1                |
| <b>M00364</b>         | C10-C20 isoprenoid biosynthesis, bacteria                                                         | 53             | 1                |
| <b>M00549</b>         | Nucleotide sugar biosynthesis, glucose => UDP-glucose                                             | 53             | 1                |
| <b>M00579</b>         | Phosphate acetyltransferase-acetate kinase pathway, acetyl-CoA => acetate                         | 53             | 1                |
| <b>M00580</b>         | Pentose phosphate pathway, archaea, fructose 6P => ribose 5P                                      | 53             | 1                |
| <b>M00700</b>         | Multidrug resistance, efflux pump AbcA                                                            | 53             | 1                |
| <b>M00702</b>         | Multidrug resistance, efflux pump NorB                                                            | 53             | 1                |
| <b>M00726</b>         | Cationic antimicrobial peptide (CAMP) resistance, lysyl-phosphatidylglycerol (L-PG) synthase MprF | 53             | 1                |
| <b>M00730</b>         | Cationic antimicrobial peptide (CAMP) resistance, VraFG transporter                               | 53             | 1                |
| <b>M00844</b>         | Arginine biosynthesis, ornithine => arginine                                                      | 53             | 1                |
| <b>M00875</b>         | Staphyloferrin B biosynthesis, L-serine => staphyloferrin B                                       | 53             | 1                |

Supplementary Table S1 (continuation). *S. aureus* KEGG-modules.

| <b>KEGG-module ID</b> | <b>KEGG-module description</b>                                                    | <b>Genomes</b> | <b>Frequency</b> |
|-----------------------|-----------------------------------------------------------------------------------|----------------|------------------|
| <b>M00876</b>         | Staphyloferrin A biosynthesis, L-ornithine => staphyloferrin A                    | 53             | 1                |
| <b>M00003</b>         | Gluconeogenesis, oxaloacetate => fructose-6P                                      | 52             | 0.98             |
| <b>M00009</b>         | Citrate cycle (TCA cycle, Krebs cycle)                                            | 52             | 0.98             |
| <b>M00011</b>         | Citrate cycle, second carbon oxidation, 2-oxoglutarate => oxaloacetate            | 52             | 0.98             |
| <b>M00021</b>         | Cysteine biosynthesis, serine => cysteine                                         | 52             | 0.98             |
| <b>M00049</b>         | Adenine ribonucleotide biosynthesis, IMP => ADP,ATP                               | 52             | 0.98             |
| <b>M00086</b>         | beta-Oxidation, acyl-CoA synthesis                                                | 52             | 0.98             |
| <b>M00432</b>         | Leucine biosynthesis, 2-oxoisovalerate => 2-oxoisocaproate                        | 52             | 0.98             |
| <b>M00555</b>         | Betaine biosynthesis, choline => betaine                                          | 52             | 0.98             |
| <b>M00577</b>         | Biotin biosynthesis, BioW pathway, pimelate => pimeloyl-CoA => biotin             | 52             | 0.98             |
| <b>M00005</b>         | PRPP biosynthesis, ribose 5P => PRPP                                              | 51             | 0.96             |
| <b>M00119</b>         | Pantothenate biosynthesis, valine/L-aspartate => pantothenate                     | 45             | 0.85             |
| <b>M00157</b>         | F-type ATPase, prokaryotes and chloroplasts                                       | 45             | 0.85             |
| <b>M00416</b>         | Cytochrome aa3-600 menaquinol oxidase                                             | 45             | 0.85             |
| <b>M00704</b>         | Tetracycline resistance, efflux pump Tet38                                        | 45             | 0.85             |
| <b>M00705</b>         | Multidrug resistance, efflux pump MepA                                            | 45             | 0.85             |
| <b>M00725</b>         | Cationic antimicrobial peptide (CAMP) resistance, dltABCD operon                  | 45             | 0.85             |
| <b>M00083</b>         | Fatty acid biosynthesis, elongation                                               | 44             | 0.83             |
| <b>M00125</b>         | Riboflavin biosynthesis, GTP => riboflavin/FMN/FAD                                | 44             | 0.83             |
| <b>M00530</b>         | Dissimilatory nitrate reduction, nitrate => ammonia                               | 43             | 0.81             |
| <b>M00023</b>         | Tryptophan biosynthesis, chorismate => tryptophan                                 | 42             | 0.79             |
| <b>M00126</b>         | Tetrahydrofolate biosynthesis, GTP => THF                                         | 42             | 0.79             |
| <b>M00048</b>         | Inosine monophosphate biosynthesis, PRPP + glutamine => IMP                       | 41             | 0.77             |
| <b>M00019</b>         | Valine/isoleucine biosynthesis, pyruvate => valine / 2-oxobutanoate => isoleucine | 38             | 0.72             |
| <b>M00570</b>         | Isoleucine biosynthesis, threonine => 2-oxobutanoate => isoleucine                | 38             | 0.72             |
| <b>M00627</b>         | beta-Lactam resistance, Bla system                                                | 24             | 0.45             |
| <b>M00625</b>         | Methicillin resistance                                                            | 13             | 0.25             |
| <b>M00714</b>         | Multidrug resistance, efflux pump QacA                                            | 11             | 0.21             |

Supplementary Table S2. *S. aureus* KEGG-pathways.

| <b>KEGG-pathway ID</b> | <b>KEGG-pathway description</b>                     | <b>Genomes</b> | <b>Frequency</b> |
|------------------------|-----------------------------------------------------|----------------|------------------|
| 00010                  | Glycolysis / Gluconeogenesis                        | 53             | 1                |
| 00020                  | Citrate cycle (TCA cycle)                           | 53             | 1                |
| 00030                  | Pentose phosphate pathway                           | 53             | 1                |
| 00040                  | Pentose and glucuronate interconversions            | 53             | 1                |
| 00051                  | Fructose and mannose metabolism                     | 53             | 1                |
| 00052                  | Galactose metabolism                                | 53             | 1                |
| 00053                  | Ascorbate and aldarate metabolism                   | 53             | 1                |
| 00061                  | Fatty acid biosynthesis                             | 53             | 1                |
| 00071                  | Fatty acid degradation                              | 53             | 1                |
| 00072                  | Synthesis and degradation of ketone bodies          | 53             | 1                |
| 00121                  | Secondary bile acid biosynthesis                    | 53             | 1                |
| 00130                  | Ubiquinone and other terpenoid-quinone biosynthesis | 53             | 1                |
| 00190                  | Oxidative phosphorylation                           | 53             | 1                |
| 00220                  | Arginine biosynthesis                               | 53             | 1                |
| 00230                  | Purine metabolism                                   | 53             | 1                |
| 00240                  | Pyrimidine metabolism                               | 53             | 1                |
| 00250                  | Alanine, aspartate and glutamate metabolism         | 53             | 1                |
| 00260                  | D-Alanine metabolism                                | 53             | 1                |
| 00261                  | Monobactam biosynthesis                             | 53             | 1                |
| 00270                  | Cysteine and methionine metabolism                  | 53             | 1                |
| 00280                  | Valine, leucine and isoleucine degradation          | 53             | 1                |
| 00281                  | Geraniol degradation                                | 53             | 1                |
| 00290                  | Valine, leucine and isoleucine biosynthesis         | 53             | 1                |
| 00300                  | Lysine biosynthesis                                 | 53             | 1                |
| 00310                  | Lysine degradation                                  | 53             | 1                |
| 00330                  | Arginine and proline metabolism                     | 53             | 1                |
| 00340                  | Histidine metabolism                                | 53             | 1                |
| 00350                  | Tyrosine metabolism                                 | 53             | 1                |
| 00360                  | Phenylalanine metabolism                            | 53             | 1                |
| 00362                  | Benzoate degradation                                | 53             | 1                |
| 00380                  | Tryptophan metabolism                               | 53             | 1                |
| 00400                  | Phenylalanine, tyrosine and tryptophan biosynthesis | 53             | 1                |
| 00401                  | Novobiocin biosynthesis                             | 53             | 1                |
| 00410                  | beta-Alanine metabolism                             | 53             | 1                |
| 00430                  | Taurine and hypotaurine metabolism                  | 53             | 1                |
| 00440                  | Phosphonate and phosphinate metabolism              | 53             | 1                |
| 00450                  | Selenocompound metabolism                           | 53             | 1                |
| 00460                  | Cyanoamino acid metabolism                          | 53             | 1                |
| 00471                  | D-Glutamine and D-glutamate metabolism              | 53             | 1                |
| 00472                  | D-Arginine and D-ornithine metabolism               | 53             | 1                |

Supplementary Table S2 (continuation). *S. aureus* KEGG-pathways.

| <b>KEGG-pathway ID</b> | <b>KEGG-pathway description</b>                           | <b>Genomes</b> | <b>Frequency</b> |
|------------------------|-----------------------------------------------------------|----------------|------------------|
| 00473                  | D-Alanine metabolism                                      | 53             | 1                |
| 00480                  | Glutathione metabolism                                    | 53             | 1                |
| 00500                  | Starch and sucrose metabolism                             | 53             | 1                |
| 00520                  | Amino sugar and nucleotide sugar metabolism               | 53             | 1                |
| 00521                  | Streptomycin biosynthesis                                 | 53             | 1                |
| 00550                  | Peptidoglycan biosynthesis                                | 53             | 1                |
| 00561                  | Glycerolipid metabolism                                   | 53             | 1                |
| 00562                  | Inositol phosphate metabolism                             | 53             | 1                |
| 00564                  | Glycerophospholipid metabolism                            | 53             | 1                |
| 00590                  | Arachidonic acid metabolism                               | 53             | 1                |
| 00592                  | alpha-Linolenic acid metabolism                           | 53             | 1                |
| 00620                  | Pyruvate metabolism                                       | 53             | 1                |
| 00622                  | Xylene degradation                                        | 53             | 1                |
| 00625                  | Chloroalkane and chloroalkene degradation                 | 53             | 1                |
| 00626                  | Naphthalene degradation                                   | 53             | 1                |
| 00630                  | Glyoxylate and dicarboxylate metabolism                   | 53             | 1                |
| 00640                  | Propanoate metabolism                                     | 53             | 1                |
| 00650                  | Butanoate metabolism                                      | 53             | 1                |
| 00660                  | C5-Branched dibasic acid metabolism                       | 53             | 1                |
| 00670                  | One carbon pool by folate                                 | 53             | 1                |
| 00680                  | Methane metabolism                                        | 53             | 1                |
| 00730                  | Thiamine metabolism                                       | 53             | 1                |
| 00740                  | Riboflavin metabolism                                     | 53             | 1                |
| 00750                  | Vitamin B6 metabolism                                     | 53             | 1                |
| 00760                  | Nicotinate and nicotinamide metabolism                    | 53             | 1                |
| 00770                  | Pantothenate and CoA biosynthesis                         | 53             | 1                |
| 00780                  | Biotin metabolism                                         | 53             | 1                |
| 00785                  | Lipoic acid metabolism                                    | 53             | 1                |
| 00790                  | Folate biosynthesis                                       | 53             | 1                |
| 00860                  | Porphyrin and chlorophyll metabolism                      | 53             | 1                |
| 00900                  | Terpenoid backbone biosynthesis                           | 53             | 1                |
| 00906                  | Carotenoid biosynthesis                                   | 53             | 1                |
| 00910                  | Nitrogen metabolism                                       | 53             | 1                |
| 00920                  | Sulfur metabolism                                         | 53             | 1                |
| 00970                  | Aminoacyl-tRNA biosynthesis                               | 53             | 1                |
| 00998                  | Biosynthesis of secondary metabolites - other antibiotics | 53             | 1                |
| 00999                  | Biosynthesis of secondary metabolites - unclassified      | 53             | 1                |
| 01100                  | Metabolic pathways                                        | 53             | 1                |
| 01110                  | Biosynthesis of secondary metabolites                     | 53             | 1                |
| 01120                  | Microbial metabolism in diverse environments              | 53             | 1                |

Supplementary Table S2 (continuation). *S. aureus* KEGG-pathways.

| <b>KEGG-pathway ID</b> | <b>KEGG-pathway description</b>                  | <b>Genomes</b> | <b>Frequency</b> |
|------------------------|--------------------------------------------------|----------------|------------------|
| <b>01130</b>           | Biosynthesis of antibiotics                      | 53             | 1                |
| <b>01200</b>           | Carbon metabolism                                | 53             | 1                |
| <b>01210</b>           | 2-Oxocarboxylic acid metabolism                  | 53             | 1                |
| <b>01212</b>           | Fatty acid metabolism                            | 53             | 1                |
| <b>01220</b>           | Degradation of aromatic compounds                | 53             | 1                |
| <b>01230</b>           | Biosynthesis of amino acids                      | 53             | 1                |
| <b>01501</b>           | beta-Lactam resistance                           | 53             | 1                |
| <b>01502</b>           | Vancomycin resistance                            | 53             | 1                |
| <b>01503</b>           | Cationic antimicrobial peptide (CAMP) resistance | 53             | 1                |
| <b>02010</b>           | ABC transporters                                 | 53             | 1                |
| <b>02020</b>           | Two-component system                             | 53             | 1                |
| <b>02024</b>           | Quorum sensing                                   | 53             | 1                |
| <b>02060</b>           | Phosphotransferase system (PTS)                  | 53             | 1                |
| <b>03010</b>           | Ribosome                                         | 53             | 1                |
| <b>03018</b>           | RNA degradation                                  | 53             | 1                |
| <b>03020</b>           | RNA polymerase                                   | 53             | 1                |
| <b>03030</b>           | DNA replication                                  | 53             | 1                |
| <b>03060</b>           | Protein export                                   | 53             | 1                |
| <b>03070</b>           | Bacterial secretion system                       | 53             | 1                |
| <b>03410</b>           | Base excision repair                             | 53             | 1                |
| <b>03420</b>           | Nucleotide excision repair                       | 53             | 1                |
| <b>03430</b>           | Mismatch repair                                  | 53             | 1                |
| <b>03440</b>           | Homologous recombination                         | 53             | 1                |
| <b>04122</b>           | Sulfur relay system                              | 53             | 1                |
| <b>05150</b>           | Staphylococcus aureus infection                  | 53             | 1                |
| <b>05100</b>           | Bacterial invasion of epithelial cells           | 37             | 0.70             |
| <b>00643</b>           | Styrene degradation                              | 2              | 0.04             |
| <b>00627</b>           | Aminobenzoate degradation                        | 1              | 0.02             |

Supplementary Table S3. *Enterobacter spp.* KEGG-modules.

| <b>KEGG-module ID</b> | <b>KEGG-module description</b>                                                    | <b>Genomes</b> | <b>Frequency</b> |
|-----------------------|-----------------------------------------------------------------------------------|----------------|------------------|
| <b>M00001</b>         | Glycolysis (Embden-Meyerhof pathway), glucose => pyruvate                         | 35             | 1                |
| <b>M00002</b>         | Glycolysis, core module involving three-carbon compounds                          | 35             | 1                |
| <b>M00003</b>         | Gluconeogenesis, oxaloacetate => fructose-6P                                      | 35             | 1                |
| <b>M00004</b>         | Pentose phosphate pathway (Pentose phosphate cycle)                               | 35             | 1                |
| <b>M00005</b>         | PRPP biosynthesis, ribose 5P => PRPP                                              | 35             | 1                |
| <b>M00006</b>         | Pentose phosphate pathway, oxidative phase, glucose 6P => ribulose 5P             | 35             | 1                |
| <b>M00007</b>         | Pentose phosphate pathway, non-oxidative phase, fructose 6P => ribose 5P          | 35             | 1                |
| <b>M00008</b>         | Entner-Doudoroff pathway, glucose-6P => glyceraldehyde-3P + pyruvate              | 35             | 1                |
| <b>M00010</b>         | Citrate cycle, first carbon oxidation, oxaloacetate => 2-oxoglutarate             | 35             | 1                |
| <b>M00012</b>         | Glyoxylate cycle                                                                  | 35             | 1                |
| <b>M00015</b>         | Proline biosynthesis, glutamate => proline                                        | 35             | 1                |
| <b>M00016</b>         | Lysine biosynthesis, succinyl-DAP pathway, aspartate => lysine                    | 35             | 1                |
| <b>M00018</b>         | Threonine biosynthesis, aspartate => homoserine => threonine                      | 35             | 1                |
| <b>M00019</b>         | Valine/isoleucine biosynthesis, pyruvate => valine / 2-oxobutanoate => isoleucine | 35             | 1                |
| <b>M00020</b>         | Serine biosynthesis, glycerate-3P => serine                                       | 35             | 1                |
| <b>M00021</b>         | Cysteine biosynthesis, serine => cysteine                                         | 35             | 1                |
| <b>M00023</b>         | Tryptophan biosynthesis, chorismate => tryptophan                                 | 35             | 1                |
| <b>M00028</b>         | Ornithine biosynthesis, glutamate => ornithine                                    | 35             | 1                |
| <b>M00051</b>         | Uridine monophosphate biosynthesis, glutamine (+ PRPP) => UMP                     | 35             | 1                |
| <b>M00061</b>         | D-Glucuronate degradation, D-glucuronate => pyruvate + D-glyceraldehyde 3P        | 35             | 1                |
| <b>M00087</b>         | beta-Oxidation                                                                    | 35             | 1                |
| <b>M00120</b>         | Coenzyme A biosynthesis, pantothenate => CoA                                      | 35             | 1                |
| <b>M00125</b>         | Riboflavin biosynthesis, GTP => riboflavin/FMN/FAD                                | 35             | 1                |
| <b>M00157</b>         | F-type ATPase, prokaryotes and chloroplasts                                       | 35             | 1                |
| <b>M00168</b>         | CAM (Crassulacean acid metabolism), dark                                          | 35             | 1                |
| <b>M00176</b>         | Assimilatory sulfate reduction, sulfate => H <sub>2</sub> S                       | 35             | 1                |
| <b>M00307</b>         | Pyruvate oxidation, pyruvate => acetyl-CoA                                        | 35             | 1                |
| <b>M00432</b>         | Leucine biosynthesis, 2-oxoisovalerate => 2-oxoisocaproate                        | 35             | 1                |
| <b>M00549</b>         | Nucleotide sugar biosynthesis, glucose => UDP-glucose                             | 35             | 1                |

Supplementary Table S3 (continuation). *Enterobacter spp.* KEGG-modules.

| <b>KEGG-module ID</b> | <b>KEGG-module description</b>                                            | <b>Genomes</b> | <b>Frequency</b> |
|-----------------------|---------------------------------------------------------------------------|----------------|------------------|
| <b>M00570</b>         | Isoleucine biosynthesis, threonine => 2-oxobutanoate => isoleucine        | 35             | 1                |
| <b>M00579</b>         | Phosphate acetyltransferase-acetate kinase pathway, acetyl-CoA => acetate | 35             | 1                |
| <b>M00844</b>         | Arginine biosynthesis, ornithine => arginine                              | 35             | 1                |
| <b>M00854</b>         | Glycogen biosynthesis, glucose-1P => glycogen/starch                      | 35             | 1                |
| <b>M00855</b>         | Glycogen degradation, glycogen => glucose-6P                              | 35             | 1                |
| <b>M00009</b>         | Citrate cycle (TCA cycle, Krebs cycle)                                    | 34             | 0.97             |
| <b>M00011</b>         | Citrate cycle, second carbon oxidation, 2-oxoglutarate => oxaloacetate    | 34             | 0.97             |
| <b>M00017</b>         | Methionine biosynthesis, aspartate => homoserine => methionine            | 34             | 0.97             |
| <b>M00022</b>         | Shikimate pathway, phosphoenolpyruvate + erythrose-4P => chorismate       | 34             | 0.97             |
| <b>M00026</b>         | Histidine biosynthesis, PRPP => histidine                                 | 34             | 0.97             |
| <b>M00049</b>         | Adenine ribonucleotide biosynthesis, IMP => ADP,ATP                       | 34             | 0.97             |
| <b>M00050</b>         | Guanine ribonucleotide biosynthesis IMP => GDP,GTP                        | 34             | 0.97             |
| <b>M00052</b>         | Pyrimidine ribonucleotide biosynthesis, UMP => UDP/UTP,CDP/CTP            | 34             | 0.97             |
| <b>M00083</b>         | Fatty acid biosynthesis, elongation                                       | 34             | 0.97             |
| <b>M00086</b>         | beta-Oxidation, acyl-CoA synthesis                                        | 34             | 0.97             |
| <b>M00116</b>         | Menaquinone biosynthesis, chorismate => menaquinol                        | 34             | 0.97             |
| <b>M00118</b>         | Glutathione biosynthesis, glutamate => glutathione                        | 34             | 0.97             |
| <b>M00119</b>         | Pantothenate biosynthesis, valine/L-aspartate => pantothenate             | 34             | 0.97             |
| <b>M00123</b>         | Biotin biosynthesis, pimeloyl-ACP/CoA => biotin                           | 34             | 0.97             |
| <b>M00126</b>         | Tetrahydrofolate biosynthesis, GTP => THF                                 | 34             | 0.97             |
| <b>M00127</b>         | Thiamine biosynthesis, AIR => thiamine-P/thiamine-2P                      | 34             | 0.97             |
| <b>M00144</b>         | NADH:quinone oxidoreductase, prokaryotes                                  | 34             | 0.97             |
| <b>M00149</b>         | Succinate dehydrogenase, prokaryotes                                      | 34             | 0.97             |
| <b>M00150</b>         | Fumarate reductase, prokaryotes                                           | 34             | 0.97             |
| <b>M00530</b>         | Dissimilatory nitrate reduction, nitrate => ammonia                       | 34             | 0.97             |
| <b>M00554</b>         | Nucleotide sugar biosynthesis, galactose => UDP-galactose                 | 34             | 0.97             |
| <b>M00616</b>         | Sulfate-sulfur assimilation                                               | 34             | 0.97             |
| <b>M00632</b>         | Galactose degradation, Leloir pathway, galactose => alpha-D-glucose-1P    | 34             | 0.97             |
| <b>M00024</b>         | Phenylalanine biosynthesis, chorismate => phenylalanine                   | 33             | 0.94             |
| <b>M00025</b>         | Tyrosine biosynthesis, chorismate => tyrosine                             | 33             | 0.94             |
| <b>M00048</b>         | Inosine monophosphate biosynthesis, PRPP + glutamine => IMP               | 33             | 0.94             |

Supplementary Table S3 (continuation). *Enterobacter spp.* KEGG-modules.

| <b>KEGG-module ID</b> | <b>KEGG-module description</b>                                                                     | <b>Genomes</b> | <b>Frequency</b> |
|-----------------------|----------------------------------------------------------------------------------------------------|----------------|------------------|
| <b>M00053</b>         | Pyrimidine deoxyribonucleotide biosynthesis, CDP/CTP => dCDP/dCTP,dTDP/dTTP                        | 33             | 0.94             |
| <b>M00063</b>         | CMP-KDO biosynthesis                                                                               | 33             | 0.94             |
| <b>M00064</b>         | ADP-L-glycero-D-manno-heptose biosynthesis                                                         | 33             | 0.94             |
| <b>M00082</b>         | Fatty acid biosynthesis, initiation                                                                | 33             | 0.94             |
| <b>M00093</b>         | Phosphatidylethanolamine (PE) biosynthesis, PA => PS => PE                                         | 33             | 0.94             |
| <b>M00115</b>         | NAD biosynthesis, aspartate => NAD                                                                 | 33             | 0.94             |
| <b>M00117</b>         | Ubiquinone biosynthesis, prokaryotes, chorismate => ubiquinone                                     | 33             | 0.94             |
| <b>M00124</b>         | Pyridoxal biosynthesis, erythrose-4P => pyridoxal-5P                                               | 33             | 0.94             |
| <b>M00364</b>         | C10-C20 isoprenoid biosynthesis, bacteria                                                          | 33             | 0.94             |
| <b>M00417</b>         | Cytochrome o ubiquinol oxidase                                                                     | 33             | 0.94             |
| <b>M00572</b>         | Pimeloyl-ACP biosynthesis, BioC-BioH pathway, malonyl-ACP => pimeloyl-ACP                          | 33             | 0.94             |
| <b>M00034</b>         | Methionine salvage pathway                                                                         | 32             | 0.91             |
| <b>M00060</b>         | KDO2-lipid A biosynthesis, Raetz pathway, LpxL-LpxM type                                           | 32             | 0.91             |
| <b>M00096</b>         | C5 isoprenoid biosynthesis, non-mevalonate pathway                                                 | 32             | 0.91             |
| <b>M00121</b>         | Heme biosynthesis, plants and bacteria, glutamate => heme                                          | 32             | 0.91             |
| <b>M00846</b>         | Siroheme biosynthesis, glutamate => siroheme                                                       | 32             | 0.91             |
| <b>M00045</b>         | Histidine degradation, histidine => N-formiminoglutamate => glutamate                              | 31             | 0.89             |
| <b>M00133</b>         | Polyamine biosynthesis, arginine => agmatine => putrescine => spermidine                           | 31             | 0.89             |
| <b>M00338</b>         | Cysteine biosynthesis, homocysteine + serine => cysteine                                           | 31             | 0.89             |
| <b>M00631</b>         | D-Galacturonate degradation (bacteria), D-galacturonate => pyruvate + D-glyceraldehyde 3P          | 31             | 0.89             |
| <b>M00533</b>         | Homoprotocatechuate degradation, homoprotocatechuate => 2-oxohept-3-enedioate                      | 31             | 0.89             |
| <b>M00550</b>         | Ascorbate degradation, ascorbate => D-xylulose-5P                                                  | 30             | 0.86             |
| <b>M00153</b>         | Cytochrome bd ubiquinol oxidase                                                                    | 29             | 0.83             |
| <b>M00555</b>         | Betaine biosynthesis, choline => betaine                                                           | 28             | 0.80             |
| <b>M00761</b>         | Undecaprenylphosphate alpha-L-Ara4N biosynthesis, UDP-GlcA => undecaprenyl phosphate alpha-L-Ara4N | 27             | 0.77             |
| <b>M00696</b>         | Multidrug resistance, efflux pump AcrEF-TolC                                                       | 26             | 0.74             |
| <b>M00565</b>         | Trehalose biosynthesis, D-glucose 1P => trehalose                                                  | 26             | 0.74             |
| <b>M00552</b>         | D-galactonate degradation, De Ley-Doudoroff pathway, D-galactonate => glycerate-3P                 | 25             | 0.71             |
| <b>M00793</b>         | dTDP-L-rhamnose biosynthesis                                                                       | 19             | 0.54             |

Supplementary Table S3 (continuation). *Enterobacter spp.* KEGG-modules.

| <b>KEGG-module ID</b> | <b>KEGG-module description</b>                                                 | <b>Genomes</b> | <b>Frequency</b> |
|-----------------------|--------------------------------------------------------------------------------|----------------|------------------|
| <b>M00136</b>         | GABA biosynthesis, prokaryotes, putrescine => GABA                             | 16             | 0.46             |
| <b>M00851</b>         | Carbapenem resistance                                                          | 11             | 0.31             |
| <b>M00122</b>         | Cobalamin biosynthesis, cobinamide => cobalamin                                | 7              | 0.20             |
| <b>M00568</b>         | Catechol ortho-cleavage, catechol => 3-oxoadipate                              | 5              | 0.14             |
| <b>M00551</b>         | Benzoate degradation, benzoate => catechol / methylbenzoate => methylcatechol  | 4              | 0.11             |
| <b>M00035</b>         | Methionine degradation                                                         | 3              | 0.09             |
| <b>M00134</b>         | Polyamine biosynthesis, arginine => ornithine => putrescine                    | 3              | 0.09             |
| <b>M00175</b>         | Nitrogen fixation, nitrogen => ammonia                                         | 3              | 0.09             |
| <b>M00545</b>         | Trans-cinnamate degradation, trans-cinnamate => acetyl-CoA                     | 2              | 0.06             |
| <b>M00345</b>         | Formaldehyde assimilation, ribulose monophosphate pathway                      | 2              | 0.06             |
| <b>M00580</b>         | Pentose phosphate pathway, archaea, fructose 6P => ribose 5P                   | 2              | 0.06             |
| <b>M00046</b>         | Pyrimidine degradation, uracil => beta-alanine, thymine => 3-aminoisobutanoate | 2              | 0.06             |
| <b>M00746</b>         | Multidrug resistance, repression of porin OmpF                                 | 1              | 0.03             |
| <b>M00027</b>         | GABA (gamma-Aminobutyrate) shunt                                               | 1              | 0.03             |

Supplementary Table S4. *Enterobacter* spp. KEGG-pathways.

| <b>KEGG-pathway ID</b> | <b>KEGG-pathway description</b>                     | <b>Genomes</b> | <b>Frequency</b> |
|------------------------|-----------------------------------------------------|----------------|------------------|
| 00010                  | Glycolysis / Gluconeogenesis                        | 35             | 1                |
| 00020                  | Citrate cycle (TCA cycle)                           | 35             | 1                |
| 00030                  | Pentose phosphate pathway                           | 35             | 1                |
| 00040                  | Pentose and glucuronate interconversions            | 35             | 1                |
| 00051                  | Fructose and mannose metabolism                     | 35             | 1                |
| 00052                  | Galactose metabolism                                | 35             | 1                |
| 00053                  | Ascorbate and aldarate metabolism                   | 35             | 1                |
| 00061                  | Fatty acid biosynthesis                             | 35             | 1                |
| 00071                  | Fatty acid degradation                              | 35             | 1                |
| 00130                  | Ubiquinone and other terpenoid-quinone biosynthesis | 35             | 1                |
| 00190                  | Oxidative phosphorylation                           | 35             | 1                |
| 00220                  | Arginine biosynthesis                               | 35             | 1                |
| 00230                  | Purine metabolism                                   | 35             | 1                |
| 00240                  | Pyrimidine metabolism                               | 35             | 1                |
| 00250                  | Alanine, aspartate and glutamate metabolism         | 35             | 1                |
| 00260                  | Glycine, serine and threonine metabolism            | 35             | 1                |
| 00261                  | Monobactam biosynthesis                             | 35             | 1                |
| 00270                  | Cysteine and methionine metabolism                  | 35             | 1                |
| 00280                  | Valine, leucine and isoleucine degradation          | 35             | 1                |
| 00281                  | Geraniol degradation                                | 35             | 1                |
| 00290                  | Valine, leucine and isoleucine biosynthesis         | 35             | 1                |
| 00300                  | Lysine biosynthesis                                 | 35             | 1                |
| 00310                  | Lysine degradation                                  | 35             | 1                |
| 00330                  | Arginine and proline metabolism                     | 35             | 1                |
| 00332                  | Carbapenem biosynthesis                             | 35             | 1                |
| 00340                  | Histidine metabolism                                | 35             | 1                |
| 00350                  | Tyrosine metabolism                                 | 35             | 1                |
| 00360                  | Phenylalanine metabolism                            | 35             | 1                |
| 00362                  | Benzoate degradation                                | 35             | 1                |
| 00380                  | Tryptophan metabolism                               | 35             | 1                |
| 00400                  | Phenylalanine, tyrosine and tryptophan biosynthesis | 35             | 1                |
| 00401                  | Novobiocin biosynthesis                             | 35             | 1                |
| 00410                  | beta-Alanine metabolism                             | 35             | 1                |
| 00430                  | Taurine and hypotaurine metabolism                  | 35             | 1                |
| 00440                  | Phosphonate and phosphinate metabolism              | 35             | 1                |
| 00450                  | Selenocompound metabolism                           | 35             | 1                |
| 00460                  | Cyanoamino acid metabolism                          | 35             | 1                |
| 00471                  | D-Glutamine and D-glutamate metabolism              | 35             | 1                |
| 00473                  | D-Alanine metabolism                                | 35             | 1                |
| 00480                  | Glutathione metabolism                              | 35             | 1                |

Supplementary Table S4 (continuation). *Enterobacter spp.* KEGG-pathways.

| <b>KEGG-pathway ID</b> | <b>KEGG-pathway description</b>             | <b>Genomes</b> | <b>Frequency</b> |
|------------------------|---------------------------------------------|----------------|------------------|
| <b>00500</b>           | Starch and sucrose metabolism               | 35             | 1                |
| <b>00511</b>           | Other glycan degradation                    | 35             | 1                |
| <b>00520</b>           | Amino sugar and nucleotide sugar metabolism | 35             | 1                |
| <b>00521</b>           | Streptomycin biosynthesis                   | 35             | 1                |
| <b>00523</b>           | Polyketide sugar unit biosynthesis          | 35             | 1                |
| <b>00540</b>           | Lipopolysaccharide biosynthesis             | 35             | 1                |
| <b>00550</b>           | Peptidoglycan biosynthesis                  | 35             | 1                |
| <b>00561</b>           | Glycerolipid metabolism                     | 35             | 1                |
| <b>00562</b>           | Inositol phosphate metabolism               | 35             | 1                |
| <b>00564</b>           | Glycerophospholipid metabolism              | 35             | 1                |
| <b>00565</b>           | Ether lipid metabolism                      | 35             | 1                |
| <b>00590</b>           | Arachidonic acid metabolism                 | 35             | 1                |
| <b>00592</b>           | alpha-Linolenic acid metabolism             | 35             | 1                |
| <b>00620</b>           | Pyruvate metabolism                         | 35             | 1                |
| <b>00625</b>           | Chloroalkane and chloroalkene degradation   | 35             | 1                |
| <b>00626</b>           | Naphthalene degradation                     | 35             | 1                |
| <b>00627</b>           | Aminobenzoate degradation                   | 35             | 1                |
| <b>00630</b>           | Glyoxylate and dicarboxylate metabolism     | 35             | 1                |
| <b>00633</b>           | Nitrotoluene degradation                    | 35             | 1                |
| <b>00640</b>           | Propanoate metabolism                       | 35             | 1                |
| <b>00650</b>           | Butanoate metabolism                        | 35             | 1                |
| <b>00660</b>           | C5-Branched dibasic acid metabolism         | 35             | 1                |
| <b>00670</b>           | One carbon pool by folate                   | 35             | 1                |
| <b>00680</b>           | Methane metabolism                          | 35             | 1                |
| <b>00730</b>           | Thiamine metabolism                         | 35             | 1                |
| <b>00740</b>           | Riboflavin metabolism                       | 35             | 1                |
| <b>00750</b>           | Vitamin B6 metabolism                       | 35             | 1                |
| <b>00760</b>           | Nicotinate and nicotinamide metabolism      | 35             | 1                |
| <b>00770</b>           | Pantothenate and CoA biosynthesis           | 35             | 1                |
| <b>00780</b>           | Biotin metabolism                           | 35             | 1                |
| <b>00785</b>           | Lipoic acid metabolism                      | 35             | 1                |
| <b>00790</b>           | Folate biosynthesis                         | 35             | 1                |
| <b>00860</b>           | Porphyrin and chlorophyll metabolism        | 35             | 1                |
| <b>00900</b>           | Terpenoid backbone biosynthesis             | 35             | 1                |
| <b>00903</b>           | Limonene and pinene degradation             | 35             | 1                |
| <b>00910</b>           | Nitrogen metabolism                         | 35             | 1                |
| <b>00920</b>           | Sulfur metabolism                           | 35             | 1                |
| <b>00930</b>           | Caprolactam degradation                     | 35             | 1                |
| <b>00970</b>           | Aminoacyl-tRNA biosynthesis                 | 35             | 1                |
| <b>01040</b>           | Biosynthesis of unsaturated fatty acids     | 35             | 1                |

Supplementary Table S4 (continuation). *Enterobacter spp.* KEGG-pathways.

| <b>KEGG-pathway ID</b> | <b>KEGG-pathway description</b>                         | <b>Genomes</b> | <b>Frequency</b> |
|------------------------|---------------------------------------------------------|----------------|------------------|
| <b>01053</b>           | Biosynthesis of siderophore group nonribosomal peptides | 35             | 1                |
| <b>01100</b>           | Metabolic pathways                                      | 35             | 1                |
| <b>01110</b>           | Biosynthesis of secondary metabolites                   | 35             | 1                |
| <b>01120</b>           | Microbial metabolism in diverse environments            | 35             | 1                |
| <b>01130</b>           | Biosynthesis of antibiotics                             | 35             | 1                |
| <b>01200</b>           | Carbon metabolism                                       | 35             | 1                |
| <b>01210</b>           | 2-Oxocarboxylic acid metabolism                         | 35             | 1                |
| <b>01212</b>           | Fatty acid metabolism                                   | 35             | 1                |
| <b>01220</b>           | Degradation of aromatic compounds                       | 35             | 1                |
| <b>01230</b>           | Biosynthesis of amino acids                             | 35             | 1                |
| <b>01501</b>           | beta-Lactam resistance                                  | 35             | 1                |
| <b>01502</b>           | Vancomycin resistance                                   | 35             | 1                |
| <b>01503</b>           | Cationic antimicrobial peptide (CAMP) resistance        | 35             | 1                |
| <b>02010</b>           | ABC transporters                                        | 35             | 1                |
| <b>02020</b>           | Two-component system                                    | 35             | 1                |
| <b>02024</b>           | Quorum sensing                                          | 35             | 1                |
| <b>02030</b>           | Bacterial chemotaxis                                    | 35             | 1                |
| <b>02060</b>           | Phosphotransferase system (PTS)                         | 35             | 1                |
| <b>03010</b>           | Ribosome                                                | 35             | 1                |
| <b>03018</b>           | RNA degradation                                         | 35             | 1                |
| <b>03020</b>           | RNA polymerase                                          | 35             | 1                |
| <b>03030</b>           | DNA replication                                         | 35             | 1                |
| <b>03060</b>           | Protein export                                          | 35             | 1                |
| <b>03070</b>           | Bacterial secretion system                              | 35             | 1                |
| <b>03410</b>           | Base excision repair                                    | 35             | 1                |
| <b>03420</b>           | Nucleotide excision repair                              | 35             | 1                |
| <b>03430</b>           | Mismatch repair                                         | 35             | 1                |
| <b>03440</b>           | Homologous recombination                                | 35             | 1                |
| <b>04122</b>           | Sulfur relay system                                     | 35             | 1                |
| <b>00361</b>           | Chlorocyclohexane and chlorobenzene degradation         | 34             | 0.97             |
| <b>00364</b>           | Fluorobenzoate degradation                              | 34             | 0.97             |
| <b>00623</b>           | Toluene degradation                                     | 34             | 0.97             |
| <b>02040</b>           | Flagellar assembly                                      | 34             | 0.97             |
| <b>00525</b>           | Acarbose and validamycin biosynthesis                   | 32             | 0.91             |
| <b>00600</b>           | Sphingolipid metabolism                                 | 25             | 0.71             |
| <b>00072</b>           | Synthesis and degradation of ketone bodies              | 18             | 0.51             |
| <b>00791</b>           | Atrazine degradation                                    | 12             | 0.34             |
| <b>00405</b>           | Phenazine biosynthesis                                  | 10             | 0.29             |
| <b>00643</b>           | Styrene degradation                                     | 9              | 0.26             |
| <b>01054</b>           | Nonribosomal peptide structures                         | 5              | 0.14             |

Supplementary Table S4 (continuation). *Enterobacter spp.* KEGG-pathways.

| <b>KEGG-pathway ID</b> | <b>KEGG-pathway description</b>       | <b>Genomes</b> | <b>Frequency</b> |
|------------------------|---------------------------------------|----------------|------------------|
| <b>00622</b>           | Xylene degradation                    | 5              | 0.14             |
| <b>00621</b>           | Dioxin degradation                    | 3              | 0.09             |
| <b>00591</b>           | Linoleic acid metabolism              | 2              | 0.06             |
| <b>00472</b>           | D-Arginine and D-ornithine metabolism | 2              | 0.06             |
| <b>00121</b>           | Secondary bile acid biosynthesis      | 1              | 0.03             |

Supplementary Table S5. *P. aeruginosa* KEGG-modules

| <b>KEGG-module ID</b> | <b>KEGG-module description</b>                                                    | <b>Genomes</b> | <b>Frequency</b> |
|-----------------------|-----------------------------------------------------------------------------------|----------------|------------------|
| <b>M00002</b>         | Glycolysis, core module involving three-carbon compounds                          | 21             | 1                |
| <b>M00007</b>         | Pentose phosphate pathway, non-oxidative phase, fructose 6P => ribose 5P          | 21             | 1                |
| <b>M00008</b>         | Entner-Doudoroff pathway, glucose-6P => glyceraldehyde-3P + pyruvate              | 21             | 1                |
| <b>M00009</b>         | Citrate cycle (TCA cycle, Krebs cycle)                                            | 21             | 1                |
| <b>M00010</b>         | Citrate cycle, first carbon oxidation, oxaloacetate => 2-oxoglutarate             | 21             | 1                |
| <b>M00011</b>         | Citrate cycle, second carbon oxidation, 2-oxoglutarate => oxaloacetate            | 21             | 1                |
| <b>M00015</b>         | Proline biosynthesis, glutamate => proline                                        | 21             | 1                |
| <b>M00016</b>         | Lysine biosynthesis, succinyl-DAP pathway, aspartate => lysine                    | 21             | 1                |
| <b>M00018</b>         | Threonine biosynthesis, aspartate => homoserine => threonine                      | 21             | 1                |
| <b>M00019</b>         | Valine/isoleucine biosynthesis, pyruvate => valine / 2-oxobutanoate => isoleucine | 21             | 1                |
| <b>M00020</b>         | Serine biosynthesis, glycerate-3P => serine                                       | 21             | 1                |
| <b>M00021</b>         | Cysteine biosynthesis, serine => cysteine                                         | 21             | 1                |
| <b>M00023</b>         | Tryptophan biosynthesis, chorismate => tryptophan                                 | 21             | 1                |
| <b>M00024</b>         | Phenylalanine biosynthesis, chorismate => phenylalanine                           | 21             | 1                |
| <b>M00028</b>         | Ornithine biosynthesis, glutamate => ornithine                                    | 21             | 1                |
| <b>M00045</b>         | Histidine degradation, histidine => N-formiminoglutamate => glutamate             | 21             | 1                |
| <b>M00046</b>         | Pyrimidine degradation, uracil => beta-alanine, thymine => 3-aminoisobutanoate    | 21             | 1                |
| <b>M00048</b>         | Inosine monophosphate biosynthesis, PRPP + glutamine => IMP                       | 21             | 1                |
| <b>M00049</b>         | Adenine ribonucleotide biosynthesis, IMP => ADP,ATP                               | 21             | 1                |
| <b>M00050</b>         | Guanine ribonucleotide biosynthesis IMP => GDP,GTP                                | 21             | 1                |
| <b>M00052</b>         | Pyrimidine ribonucleotide biosynthesis, UMP => UDP/UTP,CDP/CTP                    | 21             | 1                |
| <b>M00053</b>         | Pyrimidine deoxyribonucleotide biosynthesis, CDP/CTP => dCDP/dCTP,dTDP/dTTP       | 21             | 1                |
| <b>M00063</b>         | CMP-KDO biosynthesis                                                              | 21             | 1                |
| <b>M00064</b>         | ADP-L-glycero-D-manno-heptose biosynthesis                                        | 21             | 1                |
| <b>M00082</b>         | Fatty acid biosynthesis, initiation                                               | 21             | 1                |
| <b>M00083</b>         | Fatty acid biosynthesis, elongation                                               | 21             | 1                |
| <b>M00086</b>         | beta-Oxidation, acyl-CoA synthesis                                                | 21             | 1                |
| <b>M00087</b>         | beta-Oxidation                                                                    | 21             | 1                |

Supplementary Table S5 (continuation). *P. aeruginosa* KEGG-modules

| KEGG-module ID | KEGG-module description                                                                            | Genomes | Frequency |
|----------------|----------------------------------------------------------------------------------------------------|---------|-----------|
| M00093         | Phosphatidylethanolamine (PE) biosynthesis, PA => PS => PE                                         | 21      | 1         |
| M00115         | NAD biosynthesis, aspartate => NAD                                                                 | 21      | 1         |
| M00118         | Glutathione biosynthesis, glutamate => glutathione                                                 | 21      | 1         |
| M00119         | Pantothenate biosynthesis, valine/L-aspartate => pantothenate                                      | 21      | 1         |
| M00120         | Coenzyme A biosynthesis, pantothenate => CoA                                                       | 21      | 1         |
| M00122         | Cobalamin biosynthesis, cobinamide => cobalamin                                                    | 21      | 1         |
| M00123         | Biotin biosynthesis, pimeloyl-ACP/CoA => biotin                                                    | 21      | 1         |
| M00124         | Pyridoxal biosynthesis, erythrose-4P => pyridoxal-5P                                               | 21      | 1         |
| M00125         | Riboflavin biosynthesis, GTP => riboflavin/FMN/FAD                                                 | 21      | 1         |
| M00126         | Tetrahydrofolate biosynthesis, GTP => THF                                                          | 21      | 1         |
| M00135         | GABA biosynthesis, eukaryotes, putrescine => GABA                                                  | 21      | 1         |
| M00144         | NADH:quinone oxidoreductase, prokaryotes                                                           | 21      | 1         |
| M00149         | Succinate dehydrogenase, prokaryotes                                                               | 21      | 1         |
| M00151         | Cytochrome bc1 complex respiratory unit                                                            | 21      | 1         |
| M00155         | Cytochrome c oxidase, prokaryotes                                                                  | 21      | 1         |
| M00157         | F-type ATPase, prokaryotes and chloroplasts                                                        | 21      | 1         |
| M00176         | Assimilatory sulfate reduction, sulfate => H <sub>2</sub> S                                        | 21      | 1         |
| M00307         | Pyruvate oxidation, pyruvate => acetyl-CoA                                                         | 21      | 1         |
| M00338         | Cysteine biosynthesis, homocysteine + serine => cysteine                                           | 21      | 1         |
| M00417         | Cytochrome o ubiquinol oxidase                                                                     | 21      | 1         |
| M00432         | Leucine biosynthesis, 2-oxoisovalerate => 2-oxoisocaproate                                         | 21      | 1         |
| M00529         | Denitrification, nitrate => nitrogen                                                               | 21      | 1         |
| M00551         | Benzoate degradation, benzoate => catechol / methylbenzoate => methylcatechol                      | 21      | 1         |
| M00555         | Betaine biosynthesis, choline => betaine                                                           | 21      | 1         |
| M00568         | Catechol ortho-cleavage, catechol => 3-oxoadipate                                                  | 21      | 1         |
| M00570         | Isoleucine biosynthesis, threonine => 2-oxobutanoate => isoleucine                                 | 21      | 1         |
| M00572         | Pimeloyl-ACP biosynthesis, BioC-BioH pathway, malonyl-ACP => pimeloyl-ACP                          | 21      | 1         |
| M00579         | Phosphate acetyltransferase-acetate kinase pathway, acetyl-CoA => acetate                          | 21      | 1         |
| M00616         | Sulfate-sulfur assimilation                                                                        | 21      | 1         |
| M00637         | Anthranilate degradation, anthranilate => catechol                                                 | 21      | 1         |
| M00639         | Multidrug resistance, efflux pump MexCD-OprJ                                                       | 21      | 1         |
| M00642         | Multidrug resistance, efflux pump MexJK-OprM                                                       | 21      | 1         |
| M00761         | Undecaprenylphosphate alpha-L-Ara4N biosynthesis, UDP-GlcA => undecaprenyl phosphate alpha-L-Ara4N | 21      | 1         |

Supplementary Table S5 (continuation). *P. aeruginosa* KEGG-modules

| <b>KEGG-module ID</b> | <b>KEGG-module description</b>                                                | <b>Genomes</b> | <b>Frequency</b> |
|-----------------------|-------------------------------------------------------------------------------|----------------|------------------|
| <b>M00793</b>         | dTDP-L-rhamnose biosynthesis                                                  | 21             | 1                |
| <b>M00844</b>         | Arginine biosynthesis, ornithine => arginine                                  | 21             | 1                |
| <b>M00846</b>         | Siroheme biosynthesis, glutamate => siroheme                                  | 21             | 1                |
| <b>M00003</b>         | Gluconeogenesis, oxaloacetate => fructose-6P                                  | 20             | 0.95             |
| <b>M00005</b>         | PRPP biosynthesis, ribose 5P => PRPP                                          | 20             | 0.95             |
| <b>M00036</b>         | Leucine degradation, leucine => acetoacetate + acetyl-CoA                     | 20             | 0.95             |
| <b>M00530</b>         | Dissimilatory nitrate reduction, nitrate => ammonia                           | 20             | 0.95             |
| <b>M00533</b>         | Homoprotocatechuate degradation, homoprotocatechuate => 2-oxohept-3-enedioate | 20             | 0.95             |
| <b>M00718</b>         | Multidrug resistance, efflux pump MexAB-OprM                                  | 20             | 0.95             |
| <b>M00745</b>         | Imipenem resistance, repression of porin OprD                                 | 20             | 0.95             |
| <b>M00835</b>         | Pyocyanine biosynthesis, chorismate => pyocyanine                             | 20             | 0.95             |
| <b>M00156</b>         | Cytochrome c oxidase, cbb3-type                                               | 19             | 0.90             |
| <b>M00022</b>         | Shikimate pathway, phosphoenolpyruvate + erythrose-4P => chorismate           | 18             | 0.86             |
| <b>M00641</b>         | Multidrug resistance, efflux pump MexEF-OprN                                  | 17             | 0.81             |
| <b>M00769</b>         | Multidrug resistance, efflux pump MexPQ-OpmE                                  | 17             | 0.81             |
| <b>M00643</b>         | Multidrug resistance, efflux pump MexXY-OprM                                  | 16             | 0.76             |
| <b>M00035</b>         | Methionine degradation                                                        | 8              | 0.38             |
| <b>M00026</b>         | Histidine biosynthesis, PRPP => histidine                                     | 4              | 0.19             |
| <b>M00851</b>         | Carbapenem resistance                                                         | 3              | 0.14             |

Supplementary Table S6. *P. aeruginosa* KEGG-pathways

| <b>KEGG-pathway ID</b> | <b>KEGG-pathway description</b>                     | <b>Genomes</b> | <b>Frequency</b> |
|------------------------|-----------------------------------------------------|----------------|------------------|
| 00010                  | Glycolysis / Gluconeogenesis                        | 21             | 1                |
| 00020                  | Citrate cycle (TCA cycle)                           | 21             | 1                |
| 00030                  | Pentose phosphate pathway                           | 21             | 1                |
| 00040                  | Pentose and glucuronate interconversions            | 21             | 1                |
| 00051                  | Fructose and mannose metabolism                     | 21             | 1                |
| 00052                  | Galactose metabolism                                | 21             | 1                |
| 00053                  | Ascorbate and aldarate metabolism                   | 21             | 1                |
| 00061                  | Fatty acid biosynthesis                             | 21             | 1                |
| 00071                  | Fatty acid degradation                              | 21             | 1                |
| 00130                  | Ubiquinone and other terpenoid-quinone biosynthesis | 21             | 1                |
| 00190                  | Oxidative phosphorylation                           | 21             | 1                |
| 00220                  | Arginine biosynthesis                               | 21             | 1                |
| 00230                  | Purine metabolism                                   | 21             | 1                |
| 00240                  | Pyrimidine metabolism                               | 21             | 1                |
| 00250                  | Alanine, aspartate and glutamate metabolism         | 21             | 1                |
| 00260                  | Glycine, serine and threonine metabolism            | 21             | 1                |
| 00261                  | Monobactam biosynthesis                             | 21             | 1                |
| 00270                  | Cysteine and methionine metabolism                  | 21             | 1                |
| 00280                  | Valine, leucine and isoleucine degradation          | 21             | 1                |
| 00281                  | Geraniol degradation                                | 21             | 1                |
| 00290                  | Valine, leucine and isoleucine biosynthesis         | 21             | 1                |
| 00300                  | Lysine biosynthesis                                 | 21             | 1                |
| 00310                  | Lysine degradation                                  | 21             | 1                |
| 00330                  | Arginine and proline metabolism                     | 21             | 1                |
| 00332                  | Carbapenem biosynthesis                             | 21             | 1                |
| 00340                  | Histidine metabolism                                | 21             | 1                |
| 00350                  | Tyrosine metabolism                                 | 21             | 1                |
| 00360                  | Phenylalanine metabolism                            | 21             | 1                |
| 00361                  | Chlorocyclohexane and chlorobenzene degradation     | 21             | 1                |
| 00362                  | Benzoate degradation                                | 21             | 1                |
| 00364                  | Fluorobenzoate degradation                          | 21             | 1                |
| 00380                  | Tryptophan metabolism                               | 21             | 1                |
| 00400                  | Phenylalanine, tyrosine and tryptophan biosynthesis | 21             | 1                |
| 00401                  | Novobiocin biosynthesis                             | 21             | 1                |
| 00405                  | Phenazine biosynthesis                              | 21             | 1                |
| 00410                  | beta-Alanine metabolism                             | 21             | 1                |
| 00430                  | Taurine and hypotaurine metabolism                  | 21             | 1                |
| 00440                  | Phosphonate and phosphinate metabolism              | 21             | 1                |
| 00450                  | Selenocompound metabolism                           | 21             | 1                |
| 00460                  | Cyanoamino acid metabolism                          | 21             | 1                |

Supplementary Table S6 (continuation). *P. aeruginosa* KEGG-pathways

| <b>KEGG-pathway ID</b> | <b>KEGG-pathway description</b>             | <b>Genomes</b> | <b>Frequency</b> |
|------------------------|---------------------------------------------|----------------|------------------|
| 00471                  | D-Glutamine and D-glutamate metabolism      | 21             | 1                |
| 00472                  | D-Arginine and D-ornithine metabolism       | 21             | 1                |
| 00473                  | D-Alanine metabolism                        | 21             | 1                |
| 00480                  | Glutathione metabolism                      | 21             | 1                |
| 00500                  | Starch and sucrose metabolism               | 21             | 1                |
| 00520                  | Amino sugar and nucleotide sugar metabolism | 21             | 1                |
| 00521                  | Streptomycin biosynthesis                   | 21             | 1                |
| 00523                  | Polyketide sugar unit biosynthesis          | 21             | 1                |
| 00525                  | Acarbose and validamycin biosynthesis       | 21             | 1                |
| 00540                  | Lipopolysaccharide biosynthesis             | 21             | 1                |
| 00550                  | Peptidoglycan biosynthesis                  | 21             | 1                |
| 00561                  | Glycerolipid metabolism                     | 21             | 1                |
| 00562                  | Inositol phosphate metabolism               | 21             | 1                |
| 00564                  | Glycerophospholipid metabolism              | 21             | 1                |
| 00565                  | Ether lipid metabolism                      | 21             | 1                |
| 00590                  | Arachidonic acid metabolism                 | 21             | 1                |
| 00592                  | alpha-Linolenic acid metabolism             | 21             | 1                |
| 00600                  | Sphingolipid metabolism                     | 21             | 1                |
| 00620                  | Pyruvate metabolism                         | 21             | 1                |
| 00622                  | Xylene degradation                          | 21             | 1                |
| 00623                  | Toluene degradation                         | 21             | 1                |
| 00625                  | Chloroalkane and chloroalkene degradation   | 21             | 1                |
| 00626                  | Naphthalene degradation                     | 21             | 1                |
| 00627                  | Aminobenzoate degradation                   | 21             | 1                |
| 00630                  | Glyoxylate and dicarboxylate metabolism     | 21             | 1                |
| 00633                  | Nitrotoluene degradation                    | 21             | 1                |
| 00640                  | Propanoate metabolism                       | 21             | 1                |
| 00643                  | Styrene degradation                         | 21             | 1                |
| 00650                  | Butanoate metabolism                        | 21             | 1                |
| 00660                  | C5-Branched dibasic acid metabolism         | 21             | 1                |
| 00670                  | One carbon pool by folate                   | 21             | 1                |
| 00680                  | Methane metabolism                          | 21             | 1                |
| 00730                  | Thiamine metabolism                         | 21             | 1                |
| 00740                  | Riboflavin metabolism                       | 21             | 1                |
| 00750                  | Vitamin B6 metabolism                       | 21             | 1                |
| 00760                  | Nicotinate and nicotinamide metabolism      | 21             | 1                |
| 00770                  | Pantothenate and CoA biosynthesis           | 21             | 1                |
| 00780                  | Biotin metabolism                           | 21             | 1                |
| 00785                  | Lipoic acid metabolism                      | 21             | 1                |
| 00790                  | Folate biosynthesis                         | 21             | 1                |

Supplementary Table S6 (continuation). *P. aeruginosa* KEGG-pathways

| <b>KEGG-pathway ID</b> | <b>KEGG-pathway description</b>                         | <b>Genomes</b> | <b>Frequency</b> |
|------------------------|---------------------------------------------------------|----------------|------------------|
| <b>00860</b>           | Porphyrin and chlorophyll metabolism                    | 21             | 1                |
| <b>00900</b>           | Terpenoid backbone biosynthesis                         | 21             | 1                |
| <b>00903</b>           | Limonene and pinene degradation                         | 21             | 1                |
| <b>00910</b>           | Nitrogen metabolism                                     | 21             | 1                |
| <b>00920</b>           | Sulfur metabolism                                       | 21             | 1                |
| <b>00930</b>           | Caprolactam degradation                                 | 21             | 1                |
| <b>00970</b>           | Aminoacyl-tRNA biosynthesis                             | 21             | 1                |
| <b>01040</b>           | Biosynthesis of unsaturated fatty acids                 | 21             | 1                |
| <b>01053</b>           | Biosynthesis of siderophore group nonribosomal peptides | 21             | 1                |
| <b>01100</b>           | Metabolic pathways                                      | 21             | 1                |
| <b>01110</b>           | Biosynthesis of secondary metabolites                   | 21             | 1                |
| <b>01120</b>           | Microbial metabolism in diverse environments            | 21             | 1                |
| <b>01130</b>           | Biosynthesis of antibiotics                             | 21             | 1                |
| <b>01200</b>           | Carbon metabolism                                       | 21             | 1                |
| <b>01210</b>           | 2-Oxocarboxylic acid metabolism                         | 21             | 1                |
| <b>01212</b>           | Fatty acid metabolism                                   | 21             | 1                |
| <b>01220</b>           | Degradation of aromatic compounds                       | 21             | 1                |
| <b>01230</b>           | Biosynthesis of amino acids                             | 21             | 1                |
| <b>01501</b>           | beta-Lactam resistance                                  | 21             | 1                |
| <b>01502</b>           | Vancomycin resistance                                   | 21             | 1                |
| <b>01503</b>           | Cationic antimicrobial peptide (CAMP) resistance        | 21             | 1                |
| <b>02010</b>           | ABC transporters                                        | 21             | 1                |
| <b>02020</b>           | Two-component system                                    | 21             | 1                |
| <b>02024</b>           | Quorum sensing                                          | 21             | 1                |
| <b>02025</b>           | Biofilm formation - <i>Pseudomonas aeruginosa</i>       | 21             | 1                |
| <b>02030</b>           | Bacterial chemotaxis                                    | 21             | 1                |
| <b>02040</b>           | Flagellar assembly                                      | 21             | 1                |
| <b>02060</b>           | Phosphotransferase system (PTS)                         | 21             | 1                |
| <b>03010</b>           | Ribosome                                                | 21             | 1                |
| <b>03018</b>           | RNA degradation                                         | 21             | 1                |
| <b>03020</b>           | RNA polymerase                                          | 21             | 1                |
| <b>03030</b>           | DNA replication                                         | 21             | 1                |
| <b>03060</b>           | Protein export                                          | 21             | 1                |
| <b>03070</b>           | Bacterial secretion system                              | 21             | 1                |
| <b>03410</b>           | Base excision repair                                    | 21             | 1                |
| <b>03420</b>           | Nucleotide excision repair                              | 21             | 1                |
| <b>03430</b>           | Mismatch repair                                         | 21             | 1                |
| <b>03440</b>           | Homologous recombination                                | 21             | 1                |
| <b>03450</b>           | Non-homologous end-joining                              | 21             | 1                |

Supplementary Table S6 (continuation). *P. aeruginosa* KEGG-pathways

| <b>KEGG-pathway ID</b> | <b>KEGG-pathway description</b>            | <b>Genomes</b> | <b>Frequency</b> |
|------------------------|--------------------------------------------|----------------|------------------|
| <b>04122</b>           | Sulfur relay system                        | 21             | 1                |
| <b>00072</b>           | Synthesis and degradation of ketone bodies | 20             | 0.95             |

Supplementary Table S7. *Mycopalsma* spp. KEGG-modules

| <b>KEGG-module ID</b> | <b>KEGG-module description</b>                                            | <b>Genomes</b> | <b>Frequency</b> |
|-----------------------|---------------------------------------------------------------------------|----------------|------------------|
| <b>M00005</b>         | PRPP biosynthesis, ribose 5P => PRPP                                      | 93             | 1                |
| <b>M00157</b>         | F-type ATPase, prokaryotes and chloroplasts                               | 91             | 0.98             |
| <b>M00002</b>         | Glycolysis, core module involving three-carbon compounds                  | 89             | 0.96             |
| <b>M00579</b>         | Phosphate acetyltransferase-acetate kinase pathway, acetyl-CoA => acetate | 72             | 0.77             |
| <b>M00307</b>         | Pyruvate oxidation, pyruvate => acetyl-CoA                                | 70             | 0.75             |
| <b>M00001</b>         | Glycolysis (Embden-Meyerhof pathway), glucose => pyruvate                 | 31             | 0.33             |
| <b>M00049</b>         | Adenine ribonucleotide biosynthesis, IMP => ADP,ATP                       | 23             | 0.25             |
| <b>M00050</b>         | Guanine ribonucleotide biosynthesis IMP => GDP,GTP                        | 12             | 0.13             |
| <b>M00549</b>         | Nucleotide sugar biosynthesis, glucose => UDP-glucose                     | 8              | 0.09             |
| <b>M00120</b>         | Coenzyme A biosynthesis, pantothenate => CoA                              | 4              | 0.04             |
| <b>M00140</b>         | C1-unit interconversion, prokaryotes                                      | 1              | 0.01             |
| <b>M00854</b>         | Glycogen biosynthesis, glucose-1P => glycogen/starch                      | 1              | 0.01             |
| <b>M00048</b>         | Inosine monophosphate biosynthesis, PRPP + glutamine => IMP               | 1              | 0.01             |

Supplementary Table S8. *Mycoplasma* spp. KEGG-pathways

| <b>KEGG-pathway ID</b> | <b>KEGG-pathway description</b>              | <b>Genomes</b> | <b>Frequency</b> |
|------------------------|----------------------------------------------|----------------|------------------|
| <b>00010</b>           | Glycolysis / Gluconeogenesis                 | 93             | 1                |
| <b>00030</b>           | Pentose phosphate pathway                    | 93             | 1                |
| <b>00051</b>           | Fructose and mannose metabolism              | 93             | 1                |
| <b>00190</b>           | Oxidative phosphorylation                    | 93             | 1                |
| <b>00230</b>           | Purine metabolism                            | 93             | 1                |
| <b>00240</b>           | Pyrimidine metabolism                        | 93             | 1                |
| <b>00270</b>           | Cysteine and methionine metabolism           | 93             | 1                |
| <b>00450</b>           | Selenocompound metabolism                    | 93             | 1                |
| <b>00480</b>           | Glutathione metabolism                       | 93             | 1                |
| <b>00564</b>           | Glycerophospholipid metabolism               | 93             | 1                |
| <b>00620</b>           | Pyruvate metabolism                          | 93             | 1                |
| <b>00680</b>           | Methane metabolism                           | 93             | 1                |
| <b>00760</b>           | Nicotinate and nicotinamide metabolism       | 93             | 1                |
| <b>00970</b>           | Aminoacyl-tRNA biosynthesis                  | 93             | 1                |
| <b>01100</b>           | Metabolic pathways                           | 93             | 1                |
| <b>01110</b>           | Biosynthesis of secondary metabolites        | 93             | 1                |
| <b>01120</b>           | Microbial metabolism in diverse environments | 93             | 1                |
| <b>01130</b>           | Biosynthesis of antibiotics                  | 93             | 1                |
| <b>01200</b>           | Carbon metabolism                            | 93             | 1                |
| <b>01230</b>           | Biosynthesis of amino acids                  | 93             | 1                |
| <b>02010</b>           | ABC transporters                             | 93             | 1                |
| <b>02024</b>           | Quorum sensing                               | 93             | 1                |
| <b>03010</b>           | Ribosome                                     | 93             | 1                |
| <b>03018</b>           | RNA degradation                              | 93             | 1                |
| <b>03030</b>           | DNA replication                              | 93             | 1                |
| <b>03060</b>           | Protein export                               | 93             | 1                |
| <b>03070</b>           | Bacterial secretion system                   | 93             | 1                |
| <b>03410</b>           | Base excision repair                         | 93             | 1                |
| <b>03420</b>           | Nucleotide excision repair                   | 93             | 1                |
| <b>03430</b>           | Mismatch repair                              | 93             | 1                |
| <b>03440</b>           | Homologous recombination                     | 93             | 1                |
| <b>03020</b>           | RNA polymerase                               | 92             | 0.99             |
| <b>00500</b>           | Starch and sucrose metabolism                | 89             | 0.96             |
| <b>00260</b>           | Glycine, serine and threonine metabolism     | 86             | 0.92             |
| <b>00520</b>           | Amino sugar and nucleotide sugar metabolism  | 86             | 0.92             |
| <b>00640</b>           | Propanoate metabolism                        | 84             | 0.90             |
| <b>00561</b>           | Glycerolipid metabolism                      | 83             | 0.89             |
| <b>00730</b>           | Thiamine metabolism                          | 83             | 0.89             |
| <b>02060</b>           | Phosphotransferase system (PTS)              | 83             | 0.89             |
| <b>00020</b>           | Citrate cycle (TCA cycle)                    | 74             | 0.80             |

Supplementary Table S8 (contonuation). *Mycopalsma spp.* KEGG-pathways

| <b>KEGG-pathway ID</b> | <b>KEGG-pathway description</b>                     | <b>Genomes</b> | <b>Frequency</b> |
|------------------------|-----------------------------------------------------|----------------|------------------|
| <b>00630</b>           | Glyoxylate and dicarboxylate metabolism             | 73             | 0.78             |
| <b>00670</b>           | One carbon pool by folate                           | 73             | 0.78             |
| <b>00280</b>           | Valine, leucine and isoleucine degradation          | 72             | 0.77             |
| <b>00430</b>           | Taurine and hypotaurine metabolism                  | 72             | 0.77             |
| <b>00740</b>           | Riboflavin metabolism                               | 70             | 0.75             |
| <b>00770</b>           | Pantothenate and CoA biosynthesis                   | 65             | 0.70             |
| <b>00052</b>           | Galactose metabolism                                | 62             | 0.67             |
| <b>00040</b>           | Pentose and glucuronate interconversions            | 56             | 0.60             |
| <b>02020</b>           | Two-component system                                | 53             | 0.57             |
| <b>00460</b>           | Cyanoamino acid metabolism                          | 52             | 0.56             |
| <b>04122</b>           | Sulfur relay system                                 | 51             | 0.55             |
| <b>00625</b>           | Chloroalkane and chloroalkene degradation           | 39             | 0.42             |
| <b>00790</b>           | Folate biosynthesis                                 | 38             | 0.41             |
| <b>00053</b>           | Ascorbate and aldarate metabolism                   | 35             | 0.38             |
| <b>00250</b>           | Alanine, aspartate and glutamate metabolism         | 27             | 0.29             |
| <b>00330</b>           | Arginine and proline metabolism                     | 27             | 0.29             |
| <b>00380</b>           | Tryptophan metabolism                               | 26             | 0.28             |
| <b>00220</b>           | Arginine biosynthesis                               | 25             | 0.27             |
| <b>00310</b>           | Lysine degradation                                  | 25             | 0.27             |
| <b>00626</b>           | Naphthalene degradation                             | 21             | 0.23             |
| <b>01220</b>           | Degradation of aromatic compounds                   | 21             | 0.23             |
| <b>00900</b>           | Terpenoid backbone biosynthesis                     | 15             | 0.16             |
| <b>00521</b>           | Streptomycin biosynthesis                           | 15             | 0.16             |
| <b>00660</b>           | C5-Branched dibasic acid metabolism                 | 13             | 0.14             |
| <b>00511</b>           | Other glycan degradation                            | 9              | 0.10             |
| <b>00071</b>           | Fatty acid degradation                              | 8              | 0.09             |
| <b>00562</b>           | Inositol phosphate metabolism                       | 7              | 0.08             |
| <b>00650</b>           | Butanoate metabolism                                | 3              | 0.03             |
| <b>00400</b>           | Phenylalanine, tyrosine and tryptophan biosynthesis | 2              | 0.02             |
| <b>00590</b>           | Arachidonic acid metabolism                         | 1              | 0.01             |
| <b>00860</b>           | Porphyrin and chlorophyll metabolism                | 1              | 0.01             |
| <b>00600</b>           | Sphingolipid metabolism                             | 1              | 0.01             |
| <b>00340</b>           | Histidine metabolism                                | 1              | 0.01             |
